# Supplementary material for: Simulating measurable ecosystem carbon and nitrogen dynamics with the mechanistically-defined MEMS 2.0 model
Source: Copernicus journal article supplement (doi:10.5194/bg-2020-493), 2021-01-07
Supplement: Supplementary file [file bg-2020-493-AC1-supplement.pdf]

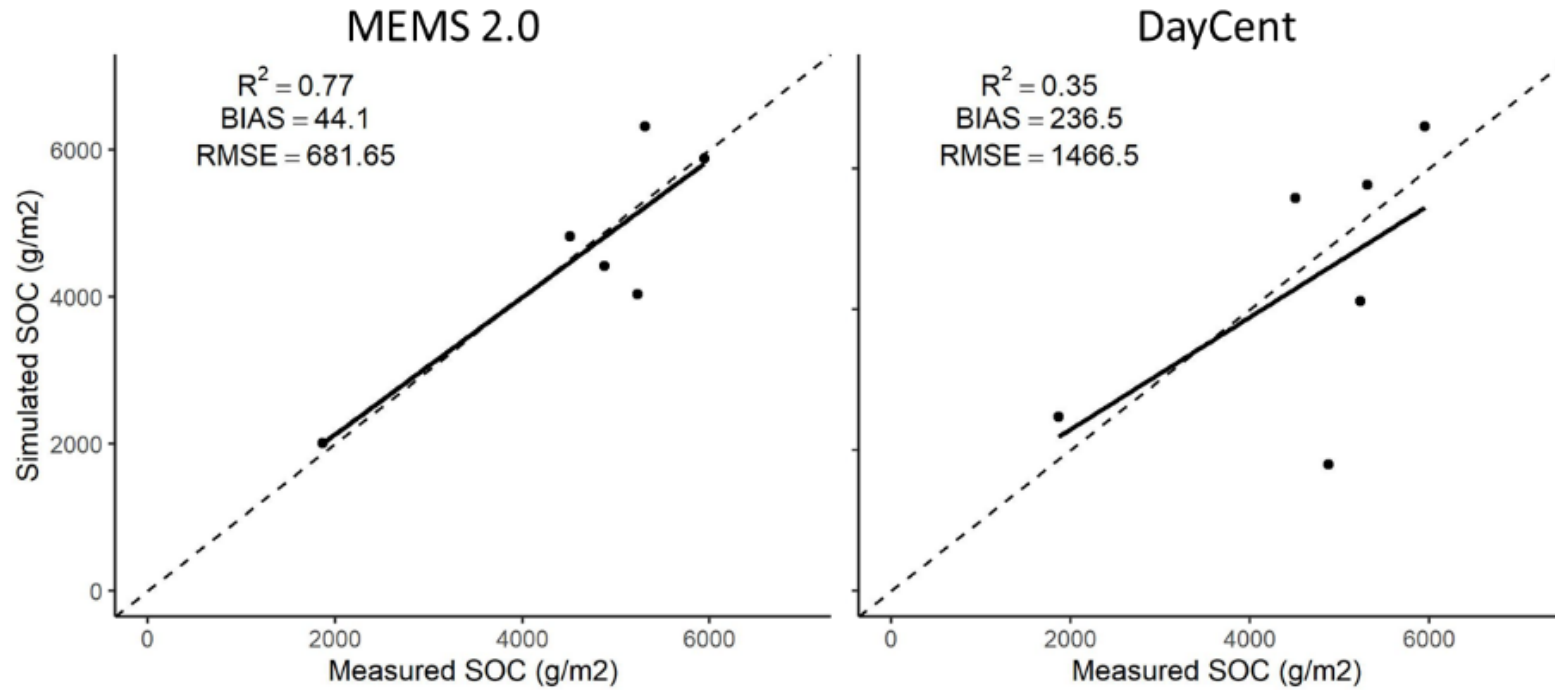

Figure 1: Preliminary results of the verification of MEMS 2.0 and DayCent (a version previously calibrated for grassland) soil organic C simulations, using the data measured in this study
